# Supplementary material
Source: Research Square preprint supplement (doi:10.21203/rs.3.rs-9493891/v1)
Supplement: Supplementary file 1 [file 7c8b8f0c899eb8ffc2a57d75.docx]

**Supplementary file**

1. Additional tables

**Supplementary Table 1: Frequency distribution of self-reported diagnosis and CSI-Tamil severity levels**

| **Part- B CSI** | **Frequency (%)** |
| --- | --- |
| CSI severity (0 - 100) |  |
| Subclinical(0-29) | 66(31.6%) |
| Mild(30-39) | 25(12%) |
| Moderate(40-49) | 33(15.8%) |
| Severe(50-59) | 31(14.8%) |
| Extreme(>=60) | 54(25.8%) |
| Diagnoses, yes |  |
| Restless leg syndrome | 10(4.8%) |
| Chronic fatigue syndrome | 1(0.5%) |
| Fibromyalgia | 4(1.9%) |
| Temporomandibular joint disorders | 2(1%) |
| Migraine or tension Headache | 20(9.6%) |
| Irritable Bowel Syndrome | 4(1.9%) |
| Multiple chemical sensitivities | 1(0.5%) |
| Neck injury | 2(1%) |
| Anxiety or panic attacks | 2(1%) |
| Depression | 36(17.2%) |

**Supplementary Table 2: Descriptive statistics of CSI-Tamil version, mean and standard deviation, and percentage of floor, and ceiling scores**

| **Item** | **Mean±SD** | **Floor effects, n(%)** | **Ceiling effects, n(%)** |
| --- | --- | --- | --- |
| **CSI total score** | 45.95 ±22.38 | 0(0%) | 0(0%) |
| **Item wise** |  |  |  |
| 1# item CSI | 2.05±1.33 | 40 (19.1%) | 39(18.7%) |
| 2# item CSI | 2.53±1.28 | 21 (10%) | 20(9.6%) |
| 3# item CSI | 1.69±1.42 | 31 (14.8%) | 30(14.4%) |
| 4# item CSI | 0.78±1.88 | 28 (13.4%) | 15(7.2%) |
| 5# item CSI | 0.90±1.25 | 22 (10.5%) | 12(5.7%) |
| 6# item CSI | 1.59±1.418 | 19(9.1%) | 24(11.5%) |
| 7# item CSI | 1.29±1.54 | 39(18.7%) | 27(12.9%) |
| 8# item CSI | 1.93±1.58 | 23(11%) | 23(11%) |
| 9# item CSI | 1.91±1.57 | 26(12.4%) | 42(20.1%) |
| 10# item CSI | 1.43±1.4 | 35(16.7%) | 25(11.9%) |
| 11# item CSI | 0.58±1.05 | 19(9.1%) | 6(2.9%) |
| 12# item CSI | 2.01±1.53 | 16(7.7%) | 23(11%) |
| 13# item CSI | 1.42±1.43 | 16(7.7%) | 26(12.4%) |
| 14# item CSI | 0.85±1.32 | 27(12.9%) | 15(7.2%) |
| 15# item CSI | 1.63±1.52 | 30(14.4%) | 16(7.7%) |
| 16# item CSI | 1.94±1.36 | 24(11.5%) | 40(19.1%) |
| 17# item CSI | 2.18±1.43 | 29(13.9%) | 32(15.3%) |
| 18# item CSI | 2.12±1.57 | 21(10%) | 29(13.9%) |
| 19# item CSI | 0.59±1.19 | 17(8.1%) | 14(6.7%) |
| 20# item CSI | 1.07±.57 | 23(11%) | 25(11.9%) |
| 21# item CSI | 1.39±1.62 | 18(8.6%) | 21(10.1%) |
| 22# item CSI | 1.91±1.69 | 34(16.3%) | 28(13.4%) |
| 23# item CSI | 1.61±1.52 | 76(36.4%) | 22(10.5%) |
| 24# item CSI | 1.63±1.65 | 22(10.5%) | 25(11.9%) |
| 25# item CSI | 2.16±1.50 | 23(11%) | 23(11%) |

**Supplementary Table 3: Structural equation model of CSI-Tamil**

| *Model fit* | | | | | | | | |
| --- | --- | --- | --- | --- | --- | --- | --- | --- |
|  | | | | n(Parameters) | | Baseline test | | |
|  | AIC | BIC | n(Observations) | Total | Free | χ² | df | p |
| Model 1 | 17424 | 17685 | 209 | 78 | 78 | 762.6 | 272.0 | < .001 |

**Supplementary Table 4: Model fit indices**

| *Fit indices* | |
| --- | --- |
| Index | Value |
| Comparative Fit Index (CFI) | 0.779 |
| Tucker-Lewis Index (TLI) | 0.756 |
| Bentler-Bonett Non-normed Fit Index (NNFI) | 0.756 |
| Bentler-Bonett Normed Fit Index (NFI) | 0.698 |
| Parsimony Normed Fit Index (PNFI) | 0.633 |
| Bollen's Relative Fit Index (RFI) | 0.667 |
| Bollen's Incremental Fit Index (IFI) | 0.782 |
| Relative Noncentrality Index (RNI) | 0.779 |
| Root mean square error of approximation (RMSEA) | 0.093 |
| RMSEA 90% CI lower bound | 0.085 |
| RMSEA 90% CI upper bound | 0.101 |
| RMSEA p-value | 0.000 |
| Standardized root mean square residual (SRMR) | 0.067 |
| Hoelter's critical N (α = .05) | 86.358 |
| Hoelter's critical N (α = .01) | 91.213 |
| Goodness of fit index (GFI) | 0.854 |
| McDonald fit index (MFI) | 0.309 |
| Expected cross validation index (ECVI) | 4.395 |
| Log-likelihood | -8634.064 |
| Number of free parameters | 78.000 |
| Akaike (AIC) | 17424.128 |
| Bayesian (BIC) | 17684.830 |
| Sample-size adjusted Bayesian (SSABIC) | 17437.685 |
